# Supplementary material for: A high-performance, flexible and robust metal nanotrough-embedded transparent conducting film for wearable touch screen panels
Source: Royal Society of Chemistry journal article supplement (doi:10.1039/c5nr07657a), 2016-01-01
Supplement: c5nr07657a2.pdf [file c5nr07657a2.pdf]

## Supporting Information

# High-Performance, Robust Metal Nanotrough-Embedded Transparent Conducting Film for Wearable Touch Screen Panel Application

Hyeon-Gyun Im,<sup>a†</sup> Byeong-Wan Ahn,<sup>b†</sup> Jungho Jin,<sup>c</sup> Junho Jang,<sup>a</sup> Young-Geun Park,<sup>b</sup> Jang-Ung Park<sup>b\*</sup> and Byeong-Soo Bae<sup>a\*</sup>

<sup>a</sup>Department of Materials Science & Engineering (MSE), Korea Advanced Institute of Science & Technology (KAIST), KOREA

<sup>b</sup>School of Materials Science & Engineering (MSE), Ulsan National Institute of Science & Technology (UNIST), KOREA

<sup>c</sup>School of Materials Science & Engineering (MSE), University of Ulsan, KOREA

## Fabrication of the metal nanotrough networks on glass for subsequent transfer process

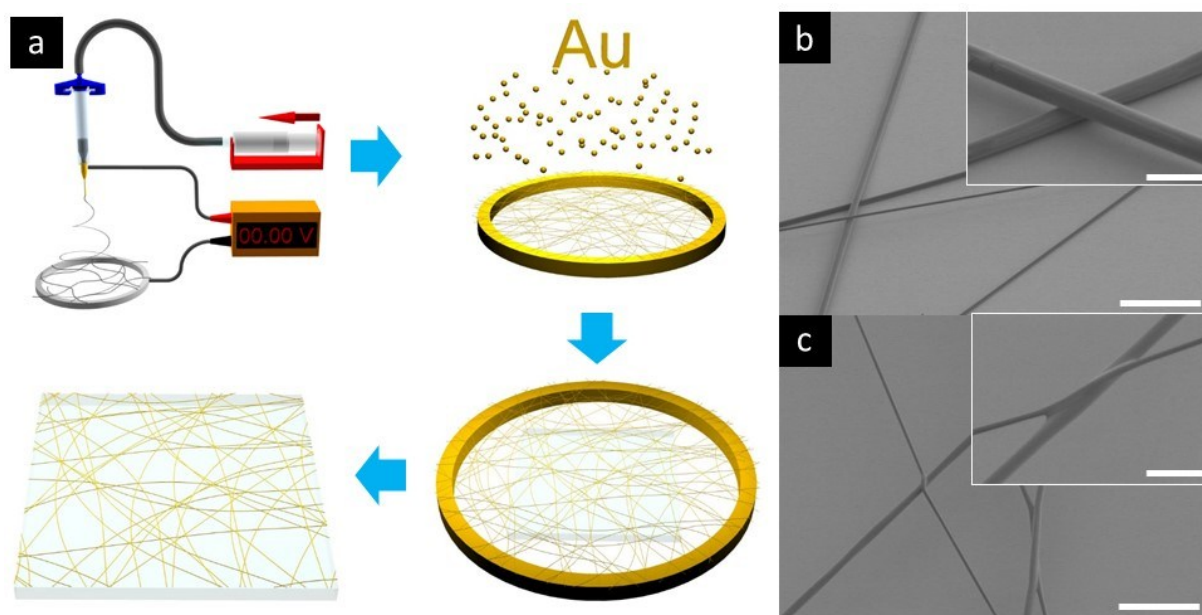

**Figure S1.** (a) Fabrication procedure of the metal nanotrough networks on glass. (b, c) SEM images for electro-spun polymer templates; (b) as-spun and (c) annealed (The insets represent magnified images). The scale bars are 10  $\mu\text{m}$  (The inset scale bars are 2  $\mu\text{m}$ ).

A water-soluble polymer (PVP) was electro-spun on an Al frame; diameter of PVP template is ca. 1  $\mu\text{m}$ . The use of conductive Al frame allows that generation of electric field between nozzle and Al frame, so one could form random/aligned free-standing PVP network. Maximum size of the Al frame used in this work is 4 in. As mentioned in Experimental Section, electro-spun polymer template was annealed at 150  $^{\circ}\text{C}$  for 1 h to promote welding of individual fibers. Note that the junctions of polymer fibers were welded as revealed in Figure S1c.

### SEM analysis of the metal nanotrough network on a glass

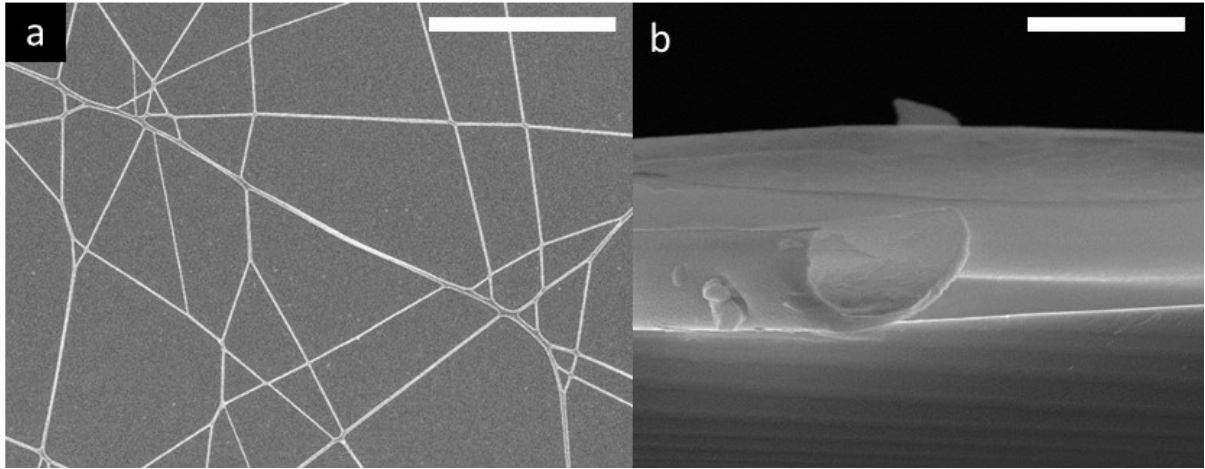

**Figure S2.** SEM images for metal nanotrough on a glass. (a) Top and (b) cross-sectional view. The scale bars are 50 and 1  $\mu\text{m}$ , respectively.

The metal nanotrough network is continuous. The diameter of the metal nanotrough is ca. 1  $\mu\text{m}$ .

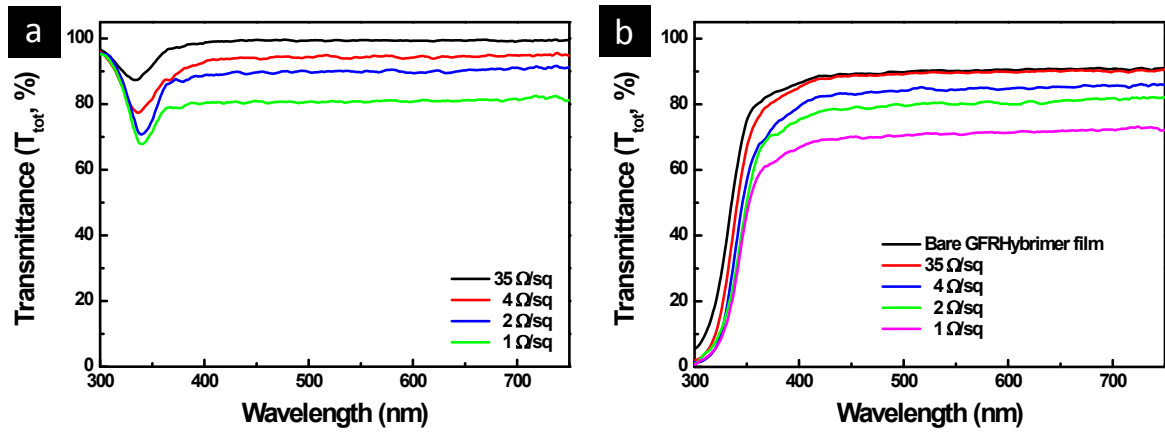

### Optical transmittance spectra of the metal nanotrough-GFRHybrimer films

**Figure S3.** Total transmittance spectra of the metal nanotrough-GFRHybrimer films with varying  $R_{\text{sh}}$  values. (a) Base-line with bare GFRHybrimer film, and (b) ambient air.

Opto-electrical performance of the metal nanotrough-GFRHybrimer films according to the electro-spinning time

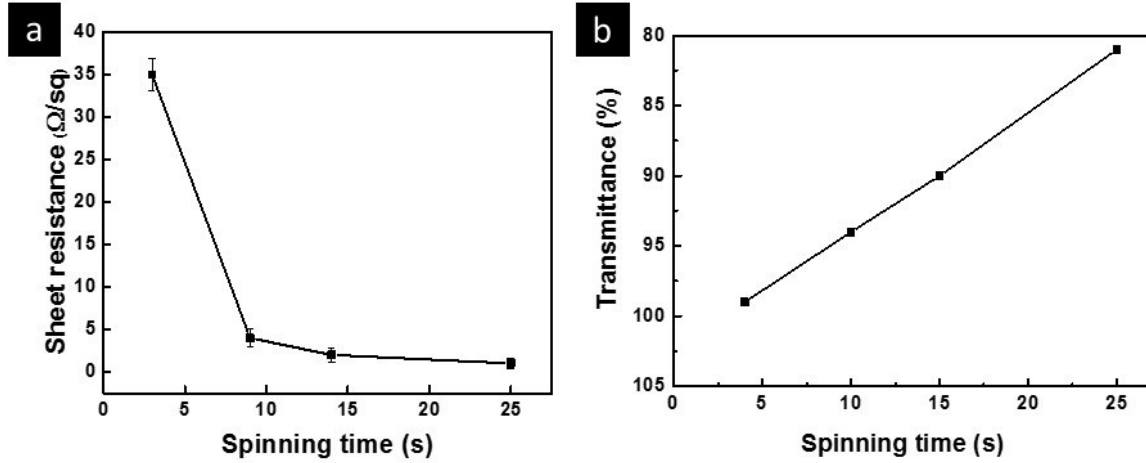

**Figure S4.** Sheet resistance (a) and transmittance (b) of metal nanotrough-GFRHybrimer films as a function of spinning time.

Note that the surface coverage of the metal nanotrough network can be controlled by electro-spinning time of polymer template. A longer electro-spinning time results in a denser metal nanotrough network. As increasing electro-spinning time, the metal nanotrough-GFRHybrimer films exhibit better electrical uniformity.

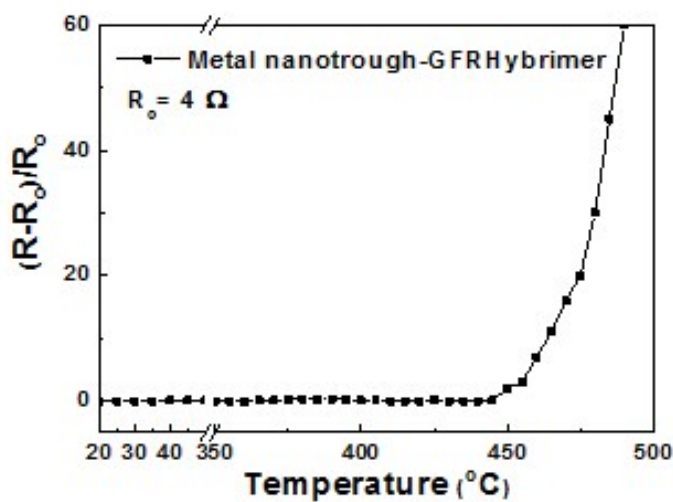

**Thermal stability of the metal nanotrough-GFRHybrimer film with elevating temperature**

**Figure S5.** Normalized  $R_{\text{sh}}$  values of the metal nanotrough-GFRHybrimer film with elevating temperature (ramp rate = 5  $^{\circ}\text{C min}^{-1}$ ).  $R_{\text{sh}}$  was maintained up to 440  $^{\circ}\text{C}$  and then increased rapidly.

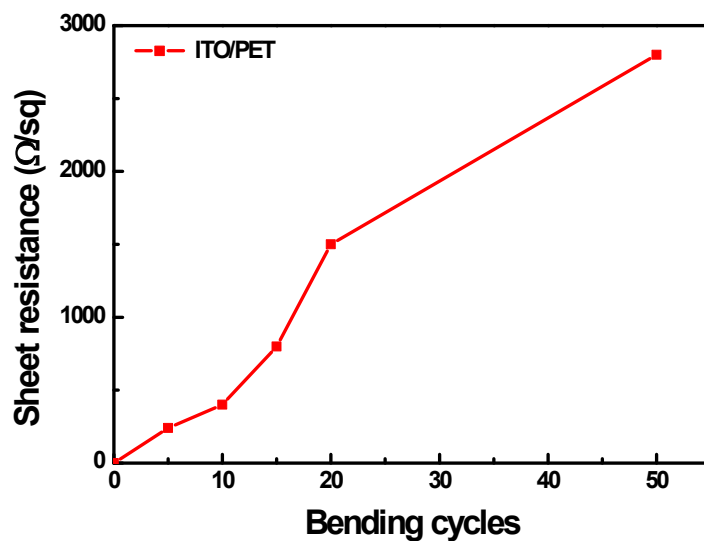

Mechanical stability of the reference ITO/PET

Figure S6. Bending test result of commercial ITO/PET sample. Bending radius is 1 mm.

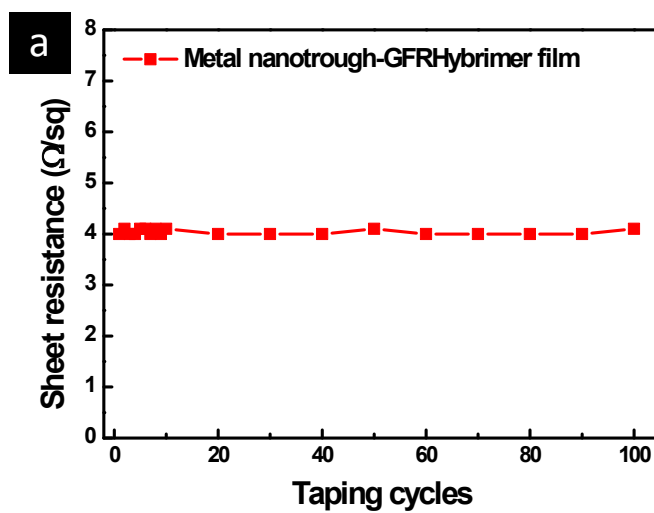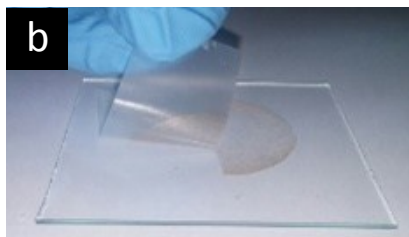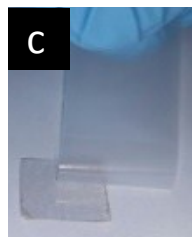

Adhesion stability of the metal nanotrough-GFRHybrimer film

Figure S7. (a) 3M tape test result of the metal nanotrough-GFRHybrimer film. Test images of (b) the metal

nanotrough on glass, and (c) the metal nanotrough-GFRHybrimer film. Note that the metal nanotrough on glass sample shows delamination of TCE network after taping.

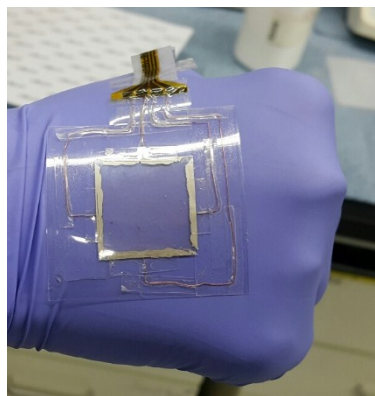

#### Touch screen panel device

**Figure S8.** Fabricated touch screen panel on a back of a human hand.

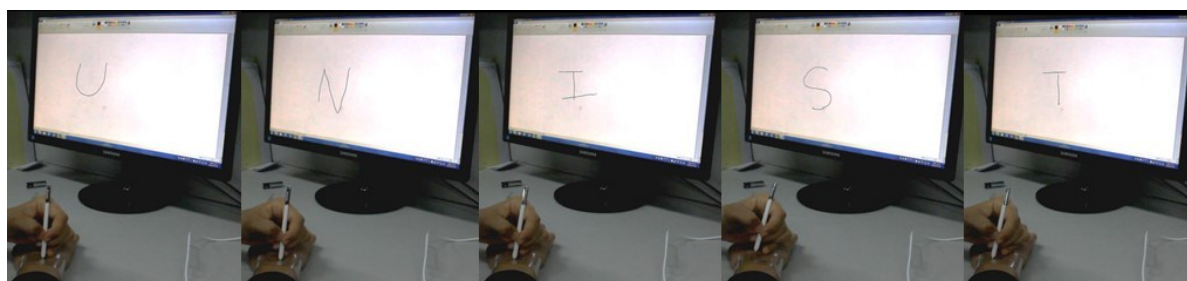

**Figure S9.** Photographs for the operation of the TSP device integrated on the wristband. Written characters are “UNIST”.
